## Placozoans are eumetazoans related to Cnidaria

Christopher E. Laumer<sup>1,2</sup>, Harald Gruber-Vodicka<sup>3</sup>, Michael G. Hadfield<sup>4</sup>, Vicki B. Pearse<sup>5</sup>, Ana Riesgo<sup>6</sup>,

4 John C. Marioni<sup>1,2,7</sup>, and Gonzalo Giribet<sup>8</sup>

1. Wellcome Trust Sanger Institute, Hinxton, CB10 1SA, United Kingdom
2. European Molecular Biology Laboratories-European Bioinformatics Institute, Hinxton, CB10 1SD, United Kingdom
- 8 3. Max Planck Institute for Marine Microbiology, Celsiusstraße 1, D-28359 Bremen, Germany
4. Kewalo Marine Laboratory, Pacific Biosciences Research Center/University of Hawai'i at Mānoa, 41 Ahui Street, Honolulu, HI 96813, United States of America
5. University of California, Santa Cruz, Institute of Marine Sciences, 1156 High Street, Santa  
12 Cruz, CA 95064, United States of America
6. The Natural History Museum, Life Sciences, Invertebrate Division Cromwell Road, London SW7 5BD, United Kingdom
7. Cancer Research UK Cambridge Institute, University of Cambridge, Li Ka Shing Centre,  
16 Robinson Way, Cambridge CB2 0RE, United Kingdom
8. Museum of Comparative Zoology, Department of Organismic and Evolutionary Biology, Harvard University, 26 Oxford Street, Cambridge, MA 02138, United States of America

24 **Abstract**

Central to understanding early animal evolution are the questions of when and how many times in the ancestry of extant animals “eumetazoan” traits – nervous and digestive systems, striated musculature, and potentially defined mesoderm or its precursors – have arisen. The phylogenetic placement of the only two major animal clades lacking these traits, poriferans (sponges) and placozoans, is crucial to this point, with the former having received much attention in recent years, and the latter relatively neglected. Here, adding new genome assemblies from three members of a previously unsampled placozoan lineage, and including a comprehensive dataset sampling the extant diversity of all other major metazoan clades and choanoflagellate outgroups, we test the positions of placozoans and poriferans using hundreds of orthologous protein-coding sequences. Surprisingly, we find strong support under well-fitting substitution models for a relationship between Cnidaria and Placozoa, contradicting a clade of Bilateria + Cnidaria (= Planulozoa) seen in previous work. This result is stable to Dayhoff 6-state recoding, a strategy commonly used to reduce artefacts from amino acid compositional heterogeneity among taxa, a problem to which the AT-rich Placozoa may be particularly susceptible. We also find that such recoding is sufficient to derive strong support for a first-splitting position of Porifera. In light of these results, it is necessary to reconsider the homology of eumetazoan traits not only between ctenophores and bilaterians, but also between cnidarians and bilaterians. Whatever traits are homologous between these taxa must also have occurred in the evolutionary history of Placozoa (or occur cryptically in modern forms), and the common ancestor of Cnidaria and Bilateria may extend deeper into the Precambrian than is presently recognized.

## 48 Introduction

The discovery<sup>1</sup> and mid-20<sup>th</sup> century rediscovery<sup>2</sup> of the enigmatic, amoeba-like placozoan *Trichoplax adhaerens* did much to ignite the imagination of zoologists interested in early animal evolution<sup>3</sup>. As a microscopic animal adapted to extracellular grazing on the biofilms over which it  
52 creeps<sup>4</sup>, *Trichoplax* has a simple anatomy suited to exploit passive diffusion for many physiological needs, with only six morphological cell types discernible even to intensive scrutiny<sup>5,6</sup>, and no muscular, nervous, or digestive systems. Reproduction is apparently primarily through asexual fission and somatic growth, although there is genetic evidence of recombination<sup>7</sup> and early abortive  
56 embryogenesis has been described<sup>8,9</sup>, with speculation that sexual phases of the life cycle occur only under poorly-understood field conditions<sup>10</sup>.

Given their simple morphology and dearth of embryological clues, molecular data are crucial in placing placozoans phylogenetically. Early phylogenetic analyses through nuclear rRNA and  
60 mitochondrial marker genes gave somewhat contradictory and/or poorly supported placements of Placozoa in the larger metazoan tree<sup>11-13</sup>. However, analyses of these markers strongly rejected some long-standing hypotheses, such as the notion that placozoans may be highly modified cnidarians<sup>14</sup>. Another important result from mitochondrial marker analyses was the revelation of a  
64 large degree of molecular diversity in placozoan isolates from around the globe, clearly indicating the existence of many morphologically cryptic haplotypes presumably corresponding to species, which are partitioned into several divergent clades showing dramatic variations in the structure and size of complete mitogenomes<sup>10,15,16</sup>. In particular, haplotypes appear to be divided between two  
68 divergent groups (clades *A* & *B*) with up to 27% genetic distance in *16S rRNA* alignments<sup>17</sup>. An apparent definitive answer to the question of placozoan affinities was provided by production of a reference nuclear genome assembly from *Trichoplax adhaerens* haplotype H1, a clade *B* representative<sup>7</sup>, which strongly supported a position relatively far from the metazoan root, as the  
72 sister group of a clade of Bilateria and Cnidaria (sometimes called Planulozoa). However, this effort

also revealed a surprisingly advanced (more accurately, bilaterian-like<sup>18</sup>) developmental gene toolkit in placozoans, a paradox for such a simple animal.

As metazoan phylogenetics has pressed onward into the genomic era, perhaps the largest controversy has been the debate over the identity of the sister group to the remaining metazoans, traditionally thought to be Porifera, but considered to be Ctenophora by Dunn et al.<sup>19</sup> and subsequently by additional studies<sup>20–23</sup>. Others have suggested this result arises from inadequate taxon sampling, flawed matrix husbandry, and use of poorly fitting substitution models<sup>24–27</sup>. A third view has emphasized that using different sets of genes can lead to different conclusions, with only a small number sometimes sufficient to drive one result or another<sup>28,29</sup>. This controversy, regardless of its eventual resolution, has spurred serious contemplation of possibly independent origins of several hallmark eumetazoan traits such as striated muscle, digestive systems, and particularly, nervous systems<sup>21,30–35</sup>.

In contrast to these upsets, as new genomic and transcriptomic data from non-bilaterians and metazoan outgroups have accrued, the position of placozoans as sister group to Planulozoa has remained relatively stable (a poorly supported result in a single early analysis notwithstanding<sup>36</sup>). However, to date, the reference H1 haplotype assembly has represented the sole branch of this deeply branching metazoan clade in almost all analyses, and the role of model violations such as nonstationarity of amino acid frequency has been inadequately explored. Here, we provide a novel test of the phylogenetic position of placozoans, adding newly sequenced genomes from three clade A placozoans, spanning the root of this divergent second group in the phylum<sup>15</sup>. We analyse them jointly under well-fitting models with a wide taxonomic diversity of available genomes and transcriptomes, thereby sampling the total available diversity of major metazoan clades and their closest outgroups: Bilateria, Cnidaria, Porifera, Ctenophora, and Choanoflagellata.

## Results and Discussion

Orthology assignment on sets of predicted proteomes derived from 59 genome and  
100 transcriptome assemblies yielded 4,294 orthogroups with at least 20 sequences each, sampling all 5  
major metazoan clades and outgroups, from which we obtained 1,388 well-aligned orthologues.  
Within this set, individual maximum-likelihood (ML) gene trees were constructed, and a set of 430  
most-informative orthologues were selected on the basis of tree-likeness scores<sup>37</sup>. This yielded an  
104 amino acid matrix of 73,547 residues with 37.55% gaps or missing data, with an average of 371.92  
and 332.75 orthologues represented for Cnidaria and Placozoa, respectively (with a maximum of 383  
orthologues present for the H4 clade representative; Figure 1).

Surprisingly, our Bayesian analyses of this matrix place Cnidaria and Placozoa as sister  
108 groups excluding Bilateria with full posterior probability under the general site-heterogeneous  
CAT+GTR+ $\Gamma$ 4 model (Figure 1). Under ML approximation of the CAT mixture model family<sup>38</sup> with LG  
substitution matrices (Figure S1), we again recover Cnidaria+Placozoa, but support for this clade is  
strong only when secondary NNI search correction on UFbootstrap trees<sup>39</sup> is not performed (Figure  
112 S1), indicating possible model misspecification (unsurprising, because models with fixed substitution  
matrices such as CAT+LG have been shown to fit less well than the more general CAT+GTR model in  
cross-validation tests<sup>40</sup>). Intriguingly, both Bayesian and ML analyses show little internal branch  
diversity within Placozoa, indicating either a dramatic deceleration of substitution rates within the  
116 crown group or, more likely, a recent extinction of all but one lineage in the ancestry of modern  
placozoans. Accordingly, deleting all clade A placozoans from our analysis has no effect on topology  
and only a marginal effect on support in ML analysis (Figure S1).

Compositional heterogeneity of amino acid frequencies along the tree is a source of  
120 phylogenetic error not modelled by even complex site-heterogeneous substitution models such as  
CAT+GTR<sup>40-43</sup>. Furthermore, previous analyses<sup>28</sup> have shown that placozoans and choanoflagellates  
in particular, both of which taxa our matrix samples intensively, deviate strongly from the mean

amino acid composition of Metazoa, perhaps as a result of genomic GC content discrepancies. A  
124 posterior predictive simulation test of amino acid stationarity from our own converged CAT+GTR+Γ4  
analyses confirms this (Table S1), showing summed absolute differences between global and taxon-  
specific amino acid frequencies (z-scores) outside the simulated null distribution for all taxa ( $p < 0.05$ )  
in the real dataset, with particularly extreme values ( $z > 60$ ) seen for most placozoans,  
128 choanoflagellates, and the calcisponge *Leucosolenia complicata*. An attempt to remove  
compositionally heterogeneous sites through a matrix-trimming algorithm (BMGE's  $\chi^2$ -test based  
operation called with the '-s FAST' flag;<sup>44</sup>) removed all but 9,776 amino acid sites from our matrix  
(downstream analyses therefore not undertaken), further confirming that indeed strong  
132 compositional heterogeneity among taxa is likely present. As an alternative step to at least partially  
ameliorate compositional bias, we therefore recoded the amino-acid matrix into 6 "Dayhoff"  
categories proposed to encompass biochemically similar residues, a strategy previously shown to  
reduce the effect of compositional variation among taxa, albeit information is lost<sup>45,46</sup>. Analysis of  
136 this recoded matrix under the CAT+GTR model again recovered full support ( $pp=1$ ) for  
Cnidaria+Placozoa (Figure 2). Indeed, in this analysis the only major change from the full alphabet  
analyses is in the relative positions of Ctenophora and Porifera, with the latter here constituting the  
sister group to the remaining Metazoa with full support. Accordingly, we suggest that compositional  
140 heterogeneity may be driving at least some of the discrepancies in the current debate over the basal  
most divergences of the metazoan tree, in both our analyses and others.

Concordance among gene trees (or the lack thereof) has also been emphasized as an  
important alternative metric of phylogenetic confidence in large-scale inference<sup>29,47</sup>. We used novel  
144 quartet-based statistics<sup>48</sup> to measure internode certainty among the 430 genes along the  
CAT+GTR+Γ4 tree. The Cnidaria+Placozoa clade had Lowest Quartet-IC (LQ-IC) and Extended  
Quadripartition (EQP-IC) scores close to 0 (Figure 1), indicating little agreement among gene trees in  
favour of this clade – but also no strong preference for any particular alternative topology, such as  
148 Planulozoa. We interpret this to indicate that support for at least some ancient relationships

emerges only in combined analyses, and can be masked at the level of the individual gene, where errors in gene tree estimation may predominate<sup>49</sup>. Indeed, many other major clades whose monophyly is not in doubt (e.g., Bilateria, Porifera) also have EQP-IC scores close to 0.

152           With only 6 morphologically salient cell types known in the asexually dividing adults<sup>6</sup>,  
placozoans are frequently dubbed the simplest extant metazoans. Evolutionary interpretations of  
this simplicity have been diametrically opposed. Some favour the possibility that the simplicity is  
plesiomorphic<sup>50,51</sup>, inherited from a common metazoan ancestor which had likewise not yet  
156           developed a basement membrane, musculature, or nervous, excretory, and internal digestive  
systems. Others propose that Placozoa must have undergone secondary simplification, indicating its  
scant significance to understanding any evolutionary path outside its own. The phylogenetic position  
of this taxon is key to this debate.

160           The position we have recovered for Placozoa as a sister group to Cnidaria is consistent with  
many rRNA-centric phylogenetic analyses<sup>11,12</sup> and may be said to resolve the paradox of a taxon  
whose gene complement closely resembles the inferred complexity of that of the cnidarian–  
bilaterian ancestor, yet which had been previously regarded as splitting off before the divergence of  
164           these two taxa<sup>7</sup>. It is tempting to interpret the existence of a Cnidaria+Placozoa clade as supporting  
the hypothesis of secondary loss of eumetazoan traits in Placozoa, particularly when considered  
jointly with our analysis (Figure 2) and others<sup>25–27</sup> which support Porifera as the sister group to all  
other metazoans. An alternative and probably more controversial interpretation of this relationship  
168           is that traits commonly held to be homologous between cnidarians and bilaterians – e.g., nervous  
systems<sup>52</sup> – might have been independently developed in both taxa from an ancestor with a grade of  
organisation similar in some respects to modern placozoans. Just as the phylogenetic controversy  
over the position of ctenophores has prompted many to seriously consider possibly independent  
172           origins of some of these traits in this taxon, we suggest that a similar critical logic be applied towards  
presumed homologies between Bilateria and Cnidaria. Indeed, there are already indications of

independent origins of striated muscle in these two clades<sup>35</sup>. In considering the relative advantages of hypotheses of primary vs. secondary absence of eumetazoan features in Placozoa, we emphasise  
176 that these two interpretations are not mutually exclusive: homology should be examined point-by-point for individual characters, avoiding the broad conclusion that any given lineage is ancestrally simple vs secondarily simplified at a whole-organism level. We see great promise for single-cell RNA-seq and its ability to achieve unbiased cell type identification as a means of resolving homologies  
180 across such widely divergent taxa<sup>53</sup>.

Much developmental work has already been conducted on cnidarian model organisms, especially *Nematostella vectensis* and *Hydra magnipapillata*, on the assumption that such work would help understand the condition from which the bilaterian lineage evolved<sup>31,52,54-58</sup>. This  
184 phylogeny supporting Placozoa + Cnidaria implies that both are equally important outgroups to understanding the bilaterian ancestor; much more experimental work therefore needs to be directed to placozoans. It may be especially fruitful to compare Placozoa and Xenacoelomorpha, the latter now firmly understood (from studies with taxon sampling adequate to address this question)  
188 to form the sister group of all remaining Bilateria<sup>59,60</sup>.

This result also implies, however, that proposed “deep” developmental correspondences between Cnidaria and Bilateria must also extend to Placozoa, at least ancestrally. For instance, much work in cnidarian models has focused on identifying germ layer homology with undisputed  
192 triploblastic animals, resulting for instance in the identification of conserved mechanisms of mesoderm specification during gastrulation in circumblastoporal cells expressing *brachyury* and regulated by the BMP-cWNT signalling<sup>55,58,61</sup>; *brachyury*-expressing cells are also found peripherally in adult placozoans<sup>62</sup>. Most intriguingly, a new model of germ layer homology has been recently put  
196 forward on the basis of lineage tracing and transcription factor expression, suggesting that the bilaterian endoderm is best understood as homologous to cnidarian and perhaps ctenophore pharyngeal ectoderm in particular<sup>63</sup>. Extending this model, it may be possible to interpret the



secretory/digestive cell layer in placozoans, comprising lower (ventral) epithelial cells, digestive  
200 lipophil cells, and gland cells<sup>6</sup> as homologous to cnidarian pharyngeal ectoderm and by extension,  
bilateral endoderm (Figure 3). In effect, under this hypothesis, one may interpret the entire  
placozoan lower epithelium as “pharyngeal”, with the margin of the body representing the outline of  
the mouth (see also<sup>36</sup>). In this light, the original interpretation of the internal, contractile, but also  
204 digestive<sup>4</sup> placozoan fibre cells as homologous to bilaterian mesoderm<sup>3,51</sup>, and by extension,  
cnidarian mesendoderm, gains traction.

Developmental observations have also been used to argue that cnidarians may have a  
cryptic and similarly specified bilateral symmetry inherited from a common ancestor with  
208 Bilateria<sup>64,65</sup>. If true, this implies that bilateral symmetry must also have been present in the stem  
placozoan lineage, although modern placozoans have not been observed to show any morphological  
or behavioural axis orthogonal to the plane of their bodies. It is interesting in this light to revisit the  
paleobiological suggestion that the iconic Ediacaran fossils of the genus *Dickinsonia* and related  
212 forms may be related to Placozoa<sup>66</sup> on the basis of a broadly similar mode of external grazing,  
through the lower part of the animal, on microbial mats that were widespread on the late  
Neoproterozoic ocean floor. The fact that such fossil forms evince a pronounced longitudinal axis of  
symmetry may be reconciled to their proposed affiliation to the modern anaxial Placozoa if a history  
216 of bilateral symmetry was indeed present in the placozoan stem. However, the utility of feeding  
mode as a phylogenetic character is limited, and in many other respects (e.g., highly regulated  
isometric growth of *Dickinsonia* by terminal addition<sup>67,68</sup>), placozoans clearly diverge from these  
Precambrian forms. Regardless of the specific affiliation of Placozoa to any given fossil taxon, one  
220 clear paleobiological consequence of our results is that the inferred divergence time between  
Cnidaria (+Placozoa) and Bilateria is likely to be much earlier than currently recognized in molecular  
clock studies<sup>69–72</sup>, potentially pushing deep into the Cryogenian period, before the planet  
experienced one or more “Snowball Earth” glaciations, and adding several tens of millions of years

224 for bilaterians to acquire the traits that define the most diverse major group of animal life on the  
planet.

## Materials and Methods

228 *Sampling, sequencing, and assembling reference genomes from Clade A placozoans*

Haplotype H4 and H6 placozoans were collected from water tables at the Kewalo Marine Laboratory, University of Hawaii-Manoa, Honolulu, Hawaii in October 2016. Haplotype H11 placozoans were collected from the Mediterranean ‘*Anthias*’ show tank in the Palma de Mallorca Aquarium, Mallorca, Spain in June 2016. All placozoans were sampled by placing glass slides suspended freely or mounted in cut-open plastic slide holders into the tanks for 10 days<sup>10</sup>. Placozoans were identified under a dissection microscope and single individuals were transferred to 500 µl of *RNAlater*, stored as per manufacturer’s recommendations.

236 DNA was extracted from 3 individuals of haplotype H11 and 5 individuals of haplotype H6 using the DNeasy Blood & Tissue Kit (Qiagen, Hilden, Germany). DNA and RNA from three haplotype H4 individuals were extracted using the AllPrep DNA/RNA Micro Kit (Qiagen), with both kits used according to manufacturer’s protocols.

240 Illumina library preparation and sequencing was performed by the Max Planck Genome Centre, Cologne, Germany. In brief, DNA/RNA quality was assessed with the Agilent 2100 Bioanalyzer (Agilent, Santa Clara, USA) and the genomic DNA was fragmented to an average fragment size of 500 bp. For the DNA samples, the concentration was increased (MinElute PCR purification kit; Qiagen, Hilden, Germany) and an Illumina-compatible library was prepared using the Ovation® Ultralow Library Systems kit (NuGEN, Leek, The Netherlands) according the manufacturer’s protocol. For the haplotype H4 RNA samples, the Ovation RNA-seq System V2 (NuGen, 376 San Carlos, CA, USA) was used to synthesize cDNA and sequencing libraries were then generated with

248 the DNA library prep kit for Illumina (BioLABS, Frankfurt am Main, Germany). All libraries were size  
selected by agarose gel electrophoresis, and the recovered fragments quality assessed and  
quantified by fluorometry. For each DNA library 14-75 million 100 bp or 150 bp paired-end reads  
were sequenced on Illumina HiSeq 2500 or 4000 machines (Illumina, San Diego, U.S.A); for the  
252 haplotype H4 RNA libraries 32-37 million single 150 bp reads were obtained.

For assembly, adapters and low-quality reads were removed with bbdup  
(<https://sourceforge.net/projects/bbmap/>) with a minimum quality value of two and a minimum  
length of 36 and single reads were excluded from the analysis. Each library was error corrected using  
256 BayesHammer<sup>73</sup>. A combined assembly of all libraries for each haplotype was performed using  
SPAdes 3.62<sup>74</sup>. Haplotype 4 and H11 data were assembled from the full read set with standard  
parameters and kmers 21, 33, 55, 77, 99. The Haplotype H6 data was preprocessed to remove all  
reads with an average kmer coverage <5 using bbnorm and then assembled with kmers 21, 33, 55  
260 and 77.

Reads from each library were mapped back to the assembled scaffolds using bbmap  
(<https://sourceforge.net/projects/bbmap/>) with the option fast=t. Scaffolds were binned based on  
the mapped read data using MetaBAT<sup>75</sup> with default settings and the ensemble binning option  
264 activated (switch -B 20). The *Trichoplax* host bins were evaluated using metawatt<sup>76</sup> based on coding  
density and sequence similarity to the *Trichoplax* H1 reference assembly ([NZ\\_ABGP000000000.1](#)). The  
bin quality metrics were computed with BUSCO2<sup>77</sup> and QUAST<sup>78</sup>.

#### *Predicting proteomes from transcriptome and genome assemblies*

268 Predicted proteomes from species with published draft genome assemblies were  
downloaded from the NCBI Genome portal or Ensembl Metazoa in June 2017. For Clade A  
placozoans, host metagenomic bins were used directly for gene annotation. For the H6 and H11  
representatives, annotation was entirely *ab initio*, performed with GeneMark-ES<sup>79</sup>; for the H4  
272 representative, total RNA-seq libraries obtained from three separate isolates (SRA accessions XXXX,

XXXX, and XXXX) were mapped to genomic contigs with STAR v2.5.3a<sup>80</sup> under default settings; merged bam files were then used to annotate genomic contigs and derive predicted peptides with BRAKER v1.9<sup>81</sup> under default settings. Choanoflagellate proteome predictions used in<sup>27</sup>) were provided as unpublished data from Dan Richter. Peptides from a *Leucosolenia complicata* transcriptome assembly were downloaded from [compagen.org](http://compagen.org). Peptide predictions from *Nemertoderma westbladi* and *Xenoturbella bocki* as used in<sup>59</sup>) were provided directly by the authors. The transcriptome assembly (raw reads unpublished) from *Euplectella aspergillum* was provided by the Satoh group, downloaded from [http://marinegenomics.oist.jp/kairou/viewer/info?project\\_id=62](http://marinegenomics.oist.jp/kairou/viewer/info?project_id=62)). Predicted peptides were derived from Trinity RNA-seq assemblies (multiple versions released 2012-2016) as described by Laumer et al.<sup>82</sup> for the following sources/SRA accessions: : Porifera: *Petrosia ficiformis*: SRR504688, *Cliona varians*: SRR1391011, *Crella elegans*: SRR648558, *Corticium candelabrum*: SRR504694-SRR499820-SRR499817, *Spongilla lacustris*: SRR1168575, *Clathrina coriacea*: SRR3417192, *Sycon coactum*: SRR504689-SRR504690, *Sycon ciliatum*: ERR466762, *Ircinia fasciculata*, *Chondrilla caribensis* (originally misidentified as *Chondrilla nucula*) and *Pseudospongosorites suberitoides* from <https://dataverse.harvard.edu/dataverse/spotranscriptomes>); Cnidaria: *Abylopsis tetragona*: SRR871525, *Stomolophus meleagris*: SRR1168418, *Craspedacusta sowerbyi*: SRR923472, *Gorgonia ventalina*: SRR935083; Ctenophora: *Vallicula multiformis*: SRR786489, *Pleurobrachia bachei*: SRR777663, *Beroe abyssicola*: SRR777787; Bilateria: *Limnognathia maerski*: SRR2131287. All other peptide predictions were derived through transcriptome assembly as paired-end, unstranded libraries with Trinity v2.4.0<sup>83</sup>, running with the –trimmomatic flag enabled (and all other parameters as default), with peptide extraction from assembled transcripts using TransDecoder v4.0.1 with default settings. For these species, no ad hoc isoform selection was performed: any redundant isoforms were removed during tree pruning in the orthologue determination pipeline (see below).

#### *Orthologue identification and alignment*

Predicted proteomes were grouped into top-level orthogroups with OrthoFinder v1.0.6<sup>84</sup>, run as a 200-threaded job, directed to stop after orthogroup assignment, and print grouped, unaligned sequences as FASTA files with the '-os' flag. A custom python script ('renamer.py') was used to rename all headers in each orthogroup FASTA file in the convention [taxon abbreviation] + '@' + [sequence number as assigned by OrthoFinder SequenceIDs.txt file], and to select only those orthogroups with membership comprising at least one of all five major metazoan clades plus outgroups, of which exactly 4,300 of an initial 46,895 were retained. Scripts in the Phylogenomic Dataset Construction pipeline<sup>85</sup> were used for successive data grooming stages as follows: Gene trees for top-level orthogroups were derived by calling the fasta\_to\_tree.py script as a job array, without bootstrap replicates; six very large orthogroups did not finish this process. In the same directory, the trim\_tips.py, mask\_tips\_by\_taxonID\_transcripts.py, and cut\_long\_internal\_branches.py scripts were called in succession, with './ .tre 10 10', './ ./ y', and './ .mm 1 20 ./' passed as arguments, respectively. The 4,267 subtrees generated through this process were concatenated into a single file and 1,419 orthologues were extracted with UPhO<sup>86</sup>. Orthologue alignment was performed using the MAFFT v7.271 'E-INS-i' algorithm, and probabilistic masking scores were assigned with ZORRO<sup>87</sup>, removing all sites in each alignment with scores below 5 as described previously<sup>82</sup>. 31 orthologues with retained lengths less than 50 amino acids were discarded, leaving 1,388 well-aligned orthologues.

### 316 *Matrix assembly*

A full concatenation of all retained orthogroups was performed with the 'geneStitcher.py' script distributed with UPhO available at <https://github.com/ballesterus/PhyloUtensils>. However, such a matrix would be too large for tractably inferring a phylogeny under well-fitting mixture models such as CAT+GTR; therefore we used MARE v0.1.2<sup>37</sup> to extract an informative subset of genes using tree-likeness scores, running with '-t 100' to retain all taxa and using '-d 1' as a tuning parameter on alignment length. This yielded our 430-orthologue, 73,547 site matrix. Parallel

matrices were constructed by selecting subsets of genes evincing strong phylogenetic signals, i.e. those whose gene trees had mean bootstrap scores with a threshold at 50 and 60%<sup>47</sup>; however, inferences performed on these matrices yielded trees judged broadly comparable to those from the matrix constructed with MARE (results not shown).

### *Phylogenetic Inference*

Individual ML gene trees were constructed on all 1,388 orthologues in IQ-tree v1.6beta, with '-m MFP -b 100' passed as parameters to perform automatic model selection and 100 standard nonparametric bootstraps on each gene tree. ML inference on the concatenated matrix (Figure 1 – Supplemental Figure 1) was performed passing '-m CAT20+LG+FO+R4 -bb 1000' as parameters to specify the mixture model and retain 1000 trees for ultrafast bootstrapping; the '-bnni' flag was used as described for analyses incorporating NNI correction<sup>39</sup>. Bayesian inference under the CAT+GTR+Γ4 model was performed in PhyloBayes MPI v1.6j<sup>43</sup> with 20 cores each dedicated to 4 separate chains, run for 2885-3222 generations with the '-dc' flag applied to remove constant sites from the analysis, and using a starting tree derived from the FastTree2 program<sup>88</sup>. The two chains used to generate the posterior consensus tree summarized in Figure 1 converged on exactly the same tree in all MCMC samples after removing the first 2000 generations as burn-in. A posterior predictive simulation test of compositional heterogeneity was performed using one of these chains, also with 2000 generations of burn-in, in PhyloBayes MPI v1.7a. Analysis of a Dayhoff-6-states recoded matrix in CAT+GTR+Γ4 was performed with the serial PhyloBayes program v4.1c, with '-dc -recode dayhoff6' passed as flags. Six chains were run from 1441-1995 generations; two chains showed a maximum bipartition discrepancy (maxdiff) of 0.042 after removing the first 1000 generations as burn-in (Figure 2). QuartetScores<sup>48</sup> was used to measure internode certainty metrics including the reported EQP-IC, using the 430 gene trees from those orthologues used to derive the matrix as evaluation trees, and using the amino acid CAT+GTR+Γ4 tree as the reference to be annotated (Figure 1).

## 348 **Acknowledgements**

Nicole Dubilier (Max Planck Institute for Marine Microbiology) contributed resources that permitted the collection and assembly of draft *Trichoplax* genomes, which were amplified and sequenced at the Max Planck-Genome-Centre Cologne. Dan Richter (King lab) and Kanako Hisata (Sato lab) provided access to unpublished transcriptomes and peptide predictions. The EMBL-EBI Systems Infrastructure team provided essential support on the EBI compute cluster.

## **Competing Interests**

The authors declare that they have no conflicting interests relating to this work.

## 356 **Source data availability**

SRA accession codes, where used, and all alternative sources for sequence data (e.g. individually hosted websites, personal communications), are listed above in the Materials and Methods section. A DataDryad accession is available at DOI: XXXXX, which makes available all scripts, orthogroups, multiple sequence alignments, phylogenetic program output, and raw host proteomes inputted to OrthoFinder. Metagenomic bins containing placozoan host contigs used to derive proteomes from H4, H6 and H11 isolates are also provided in this accession.

## **Author Contributions**

364 CEL assembled most libraries, conducted all analyses starting from predicted peptides onwards, and wrote the initial draft. HGV collected clade A placozoan isolates from Majorca, maintained Hawaiian isolates prior to sequencing at the MPI for Marine Microbiology, submitted purified nucleic acids for amplification and sequencing, and assembled and provided binned  
368 metagenomic contigs. MH and VBP assisted with collection of the original Hawaiian placozoan isolates, and H4 and H6 samples used for sequencing were derived from clones originally established by MGH at the Kewalo Marine Labs. AR generated new transcriptomic data for many sponge taxa.

CEL, JCM and GG conceptualized and initiated this work, and supervised throughout. All authors read  
372 and contributed to the final manuscript.

## References

1. Schulze, F. E. *Trichoplax adhaerens*, nov. gen., nov. spec. *Zool. Anz.* **6**, 92–97 (1883).
- 376 2. Grell, K. G. & Benwitz, B. Die Ultrastruktur von *Trichoplax adhaerens* F. E. Schultze. *Cytobiologie* **4**, 216–240 (1971).
3. Bütschli, O. Bemerkungen zur Gastraea-Theorie. *Morphol. Jahrb.* **9**, 415–427 (1884).
4. Wenderoth, H. Transepithelial Cytophagy by *Trichoplax adhaerens* F. E. Schulze (Placozoa)  
380 Feeding on Yeast. *Z. Für Naturforschung C* **41c**, 343–347 (1986).
5. Grell, K. G. & Ruthmann, A. Placozoa. in *Microscopic Anatomy of Invertebrates* (eds. Harrison, F. & Westfall, J. A.) 13–28 (Wiley-Liss, 1991).
6. Smith, C. L. *et al.* Novel cell types, neurosecretory cells, and body plan of the early-diverging  
384 metazoan *Trichoplax adhaerens*. *Curr. Biol.* **24**, 1565–1572 (2014).
7. Srivastava, M. *et al.* The *Trichoplax* genome and the nature of placozoans. *Nature* **454**, 955–960  
(2008).
8. Eitel, M., Guidi, L., Hadrys, H., Balsamo, M. & Schierwater, B. New insights into placozoan sexual  
388 reproduction and development. *PLOS ONE* **6**, e19639 (2011).
9. Grell, K. G. Eibildung und Furchung von *Trichoplax adhaerens* F.E. Schulze (Placozoa). *Z. Für*  
*Morphol. Tiere* **73**, 297–314 (1972).
10. Pearse, V. B. & Voigt, O. Field biology of placozoans (*Trichoplax*): distribution, diversity, biotic  
392 interactions. *Integr. Comp. Biol.* **47**, 677–692 (2007).
11. Kim, J., Kim, W. & Cunningham, C. W. A new perspective on lower metazoan relationships from  
18S rDNA sequences. *Mol. Biol. Evol.* **16**, 423–427 (1999).



12. Silva, F. B. da, Muschner, V. C. & Bonatto, S. L. Phylogenetic position of Placozoa based on large  
396 subunit (LSU) and small subunit (SSU) rRNA genes. *Genet. Mol. Biol.* **30**, 127–132 (2007).
13. Wallberg, A., Thollesson, M., Farris, J. S. & Jondelius, U. The phylogenetic position of the comb  
jellies (Ctenophora) and the importance of taxonomic sampling. *Cladistics* **20**, 558–578 (2004).
14. Ender, A. & Schierwater, B. Placozoa are not derived cnidarians: evidence from molecular  
400 morphology. *Mol. Biol. Evol.* **20**, 130–134 (2003).
15. Eitel, M., Osigus, H.-J., DeSalle, R. & Schierwater, B. Global diversity of the Placozoa. *PLOS ONE* **8**,  
e57131 (2013).
16. Signorovitch, A. Y., Buss, L. W. & Dellaporta, S. L. Comparative genomics of large mitochondria in  
404 placozoans. *PLOS Genet.* **3**, e13 (2007).
17. Eitel, M. & Schierwater, B. The phylogeography of the Placozoa suggests a taxon-rich phylum in  
tropical and subtropical waters. *Mol. Ecol.* **19**, 2315–2327 (2010).
18. Dunn, C. W., Leys, S. P. & Haddock, S. H. D. The hidden biology of sponges and ctenophores.  
408 *Trends Ecol. Evol.* **30**, 282–291 (2015).
19. Dunn, C. W. *et al.* Broad phylogenomic sampling improves resolution of the animal tree of life.  
*Nature* **452**, 745–749 (2008).
20. Hejnol, A. *et al.* Assessing the root of bilaterian animals with scalable phylogenomic methods.  
412 *Proc. R. Soc. Lond. B Biol. Sci.* **276**, 4261–4270 (2009).
21. Moroz, L. L. *et al.* The ctenophore genome and the evolutionary origins of neural systems.  
*Nature* **510**, 109–114 (2014).
22. Ryan, J. F. *et al.* The genome of the ctenophore *Mnemiopsis leidyi* and its implications for cell  
416 type evolution. *Science* **342**, 1242592 (2013).
23. Whelan, N. V., Kocot, K. M., Moroz, L. L. & Halanych, K. M. Error, signal, and the placement of  
Ctenophora sister to all other animals. *Proc. Natl. Acad. Sci.* **112**, 5773–5778 (2015).
24. Philippe, H. *et al.* Phylogenomics revives traditional views on deep animal relationships. *Curr.*  
420 *Biol. CB* **19**, 706–712 (2009).

25. Pick, K. S. *et al.* Improved phylogenomic taxon sampling noticeably affects nonbilaterian relationships. *Mol. Biol. Evol.* **27**, 1983–1987 (2010).
26. Pisani, D. *et al.* Genomic data do not support comb jellies as the sister group to all other animals. *Proc. Natl. Acad. Sci.* **112**, 15402–15407 (2015).  
424
27. Simion, P. *et al.* A large and consistent phylogenomic dataset supports sponges as the sister group to all other animals. *Curr. Biol.* **27**, 958–967 (2017).
28. Nosenko, T. *et al.* Deep metazoan phylogeny: when different genes tell different stories. *Mol. Phylogenet. Evol.* **67**, 223–233 (2013).  
428
29. Shen, X.-X., Hittinger, C. T. & Rokas, A. Contentious relationships in phylogenomic studies can be driven by a handful of genes. *Nat. Ecol. Evol.* **1**, s41559–017–0126–017 (2017).
30. Dayraud, C. *et al.* Independent specialisation of myosin II paralogues in muscle vs. non-muscle functions during early animal evolution: a ctenophore perspective. *BMC Evol. Biol.* **12**, 107  
432 (2012).
31. Hejnol, A. & Martín-Durán, J. M. Getting to the bottom of anal evolution. *Zool. Anz. - J. Comp. Zool.* **256**, 61–74 (2015).
32. Liebeskind, B. J., Hofmann, H. A., Hillis, D. M. & Zakon, H. H. Evolution of animal neural systems. *Annu. Rev. Ecol. Evol. Syst.* **48**, in Press (2017).  
436
33. Moroz, L. L. & Kohn, A. B. Independent origins of neurons and synapses: insights from ctenophores. *Phil Trans R Soc B* **371**, 20150041 (2016).
34. Presnell, J. S. *et al.* The presence of a functionally tripartite through-gut in Ctenophora has implications for metazoan character trait evolution. *Curr. Biol.* **26**, 2814–2820 (2016).  
440
35. Steinmetz, P. R. H. *et al.* Independent evolution of striated muscles in cnidarians and bilaterians. *Nature* **487**, 231–234 (2012).
36. Schierwater, B. *et al.* Concatenated analysis sheds light on early metazoan evolution and fuels a modern ‘Urmetzoon’ hypothesis. *PLOS Biol.* **7**, e1000020 (2009).  
444

37. Misof, B. *et al.* Selecting informative subsets of sparse supermatrices increases the chance to find correct trees. *BMC Bioinformatics* **14**, 348 (2013).
- 448 38. Wang, H.-C., Minh, B. Q., Susko, E. & Roger, A. J. Modeling site heterogeneity with posterior mean site frequency profiles accelerates accurate phylogenomic estimation. *Syst. Biol.* (2017). doi:10.1093/sysbio/syx068
39. Hoang, D. T., Chernomor, O., Haeseler, A. von, Minh, B. Q. & Le, V. S. UFBoot2: improving the  
452 ultrafast bootstrap approximation. *bioRxiv* 153916 (2017). doi:10.1101/153916
40. Lartillot, N. & Philippe, H. A Bayesian mixture model for across-site heterogeneities in the amino-acid replacement process. *Mol. Biol. Evol.* **21**, 1095–1109 (2004).
41. Blanquart, S. & Lartillot, N. A site- and time-heterogeneous model of amino acid replacement.  
456 *Mol. Biol. Evol.* **25**, 842–858 (2008).
42. Foster, P. G. & Schultz, T. Modeling compositional heterogeneity. *Syst. Biol.* **53**, 485–495 (2004).
43. Lartillot, N., Rodrigue, N., Stubbs, D. & Richer, J. PhyloBayes MPI: phylogenetic reconstruction with infinite mixtures of profiles in a parallel environment. *Syst. Biol.* **62**, 611–615 (2013).
- 460 44. Criscuolo, A. & Gribaldo, S. BMGE (Block Mapping and Gathering with Entropy): a new software for selection of phylogenetic informative regions from multiple sequence alignments. *BMC Evol. Biol.* **10**, 210 (2010).
45. Nesnidal, M. P., Helmkampf, M., Bruchhaus, I. & Hausdorf, B. Compositional heterogeneity and  
464 phylogenomic inference of metazoan relationships. *Mol. Biol. Evol.* **27**, 2095–2104 (2010).
46. Rota-Stabelli, O., Lartillot, N., Philippe, H. & Pisani, D. Serine codon-usage bias in deep phylogenomics: pancrustacean relationships as a case study. *Syst. Biol.* **62**, 121–133 (2013).
47. Salichos, L. & Rokas, A. Inferring ancient divergences requires genes with strong phylogenetic  
468 signals. *Nature* **497**, 327–331 (2013).
48. Zhou, X. *et al.* Quartet-based computations of internode certainty provide accurate and robust measures of phylogenetic incongruence. *bioRxiv* 168526 (2017). doi:10.1101/168526

49. Gatesy, J., Baker, R. H. & Buckley, T. Hidden likelihood support in genomic data: can forty-five  
472 wrongs make a right? *Syst. Biol.* **54**, 483–492 (2005).
50. Schierwater, B. My favorite animal, *Trichoplax adhaerens*. *BioEssays* **27**, 1294–1302 (2005).
51. Syed, T. & Schierwater, B. *Trichoplax adhaerens*: discovered as a missing link, forgotten as a  
hydrozoan, re-discovered as a key to metazoan evolution. *Vie Milieu* **52**, 177–187 (2002).
- 476 52. Kelava, I., Rentzsch, F. & Technau, U. Evolution of eumetazoan nervous systems: insights from  
cnidarians. *Phil Trans R Soc B* **370**, 20150065 (2015).
53. Marioni, J. C. & Arendt, D. How single-cell genomics is changing evolutionary and developmental  
biology. *Annu. Rev. Cell Dev. Biol.* **33**, null (2017).
- 480 54. Chourrout, D. *et al.* Minimal ProtoHox cluster inferred from bilaterian and cnidarian Hox  
complements. *Nature* **442**, 684–687 (2006).
55. Martindale, M. Q., Pang, K. & Finnerty, J. R. Investigating the origins of triploblasty:  
‘mesodermal’ gene expression in a diploblastic animal, the sea anemone *Nematostella vectensis*  
484 (phylum, Cnidaria; class, Anthozoa). *Development* **131**, 2463–2474 (2004).
56. Miller, D. J., Ball, E. E. & Technau, U. Cnidarians and ancestral genetic complexity in the animal  
kingdom. *Trends Genet.* **21**, 536–539 (2005).
57. Philipp, I. *et al.* Wnt/ $\beta$ -Catenin and noncanonical Wnt signaling interact in tissue evagination in  
488 the simple eumetazoan *Hydra*. *Proc. Natl. Acad. Sci.* **106**, 4290–4295 (2009).
58. Wijesena, N., Simmons, D. K. & Martindale, M. Q. Antagonistic BMP–cWNT signaling in the  
cnidarian *Nematostella vectensis* reveals insight into the evolution of mesoderm. *Proc. Natl.*  
*Acad. Sci.* **114**, E5608–E5615 (2017).
- 492 59. Cannon, J. T. *et al.* Xenacoelomorpha is the sister group to Nephrozoa. *Nature* **530**, 89–93  
(2016).
60. Rouse, G. W., Wilson, N. G., Carvajal, J. I. & Vrijenhoek, R. C. New deep-sea species of  
*Xenoturbella* and the position of Xenacoelomorpha. *Nature* **530**, 94–97 (2016).

- 496 61. Yasuoka, Y., Shinzato, C. & Satoh, N. The mesoderm-forming gene *brachyury* regulates  
ectoderm-endoderm demarcation in the coral *Acropora digitifera*. *Curr. Biol.* **26**, 2885–2892  
(2016).
62. Martinelli, C. & Spring, J. Distinct expression patterns of the two T-box homologues Brachyury  
500 and Tbx2/3 in the placozoan *Trichoplax adhaerens*. *Dev. Genes Evol.* **213**, 492–499 (2003).
63. Steinmetz, P. R. H., Aman, A., Kraus, J. E. M. & Technau, U. Gut-like ectodermal tissue in a sea  
anemone challenges germ layer homology. *Nat. Ecol. Evol.* **1** (2017). doi:10.1038/s41559-017-  
0285-5
- 504 64. Finnerty, J. R., Pang, K., Burton, P., Paulson, D. & Martindale, M. Q. Origins of bilateral  
symmetry: Hox and dpp expression in a sea anemone. *Science* **304**, 1335–1337 (2004).
65. Matus, D. Q. *et al.* Molecular evidence for deep evolutionary roots of bilaterality in animal  
development. *Proc. Natl. Acad. Sci.* **103**, 11195–11200 (2006).
- 508 66. Sperling, E. A. & Vinther, J. A placozoan affinity for *Dickinsonia* and the evolution of late  
Proterozoic metazoan feeding modes. *Evol. Dev.* **12**, 201–209 (2010).
67. Evans, S. D., Droser, M. L. & Gehling, J. G. Highly regulated growth and development of the  
Ediacara microfossil *Dickinsonia costata*. *PLOS ONE* **12**, e0176874 (2017).
- 512 68. Gold, D. A., Runnegar, B., Gehling, J. G. & Jacobs, D. K. Ancestral state reconstruction of  
ontogeny supports a bilaterian affinity for *Dickinsonia*. *Evol. Dev.* **17**, 315–324 (2015).
69. Cunningham, J. A., Liu, A. G., Bengtson, S. & Donoghue, P. C. J. The origin of animals: Can  
molecular clocks and the fossil record be reconciled? *BioEssays* **39**, 1–12 (2017).
- 516 70. Dohrmann, M. & Wörheide, G. Dating early animal evolution using phylogenomic data. *Sci. Rep.*  
**7**, (2017).
71. Erwin, D. H. Early metazoan life: divergence, environment and ecology. *Phil Trans R Soc B* **370**,  
20150036 (2015).
- 520 72. Dos Reis, M. *et al.* Uncertainty in the timing of origin of animals and the limits of precision in  
molecular timescales. *Curr. Biol.* **25**, 2939–2950 (2015).

73. Nikolenko, S. I., Korobeynikov, A. I. & Alekseyev, M. A. BayesHammer: Bayesian clustering for error correction in single-cell sequencing. *BMC Genomics* **14**, S7 (2013).
- 524 74. Bankevich, A. *et al.* SPAdes: a new genome assembly algorithm and its applications to single-cell sequencing. *J. Comput. Biol.* **19**, 455–477 (2012).
75. Kang, D. D., Froula, J., Egan, R. & Wang, Z. MetaBAT, an efficient tool for accurately reconstructing single genomes from complex microbial communities. *PeerJ* **3**, e1165 (2015).
- 528 76. Strous, M., Kraft, B., Bisdorf, R. & Tegetmeyer, H. E. The binning of metagenomic contigs for microbial physiology of mixed cultures. *Front. Microbiol.* **3**, (2012).
77. Simão, F. A., Waterhouse, R. M., Ioannidis, P., Kriventseva, E. V. & Zdobnov, E. M. BUSCO: assessing genome assembly and annotation completeness with single-copy orthologs. *Bioinforma. Oxf. Engl.* **31**, 3210–3212 (2015).
- 532 78. Gurevich, A., Saveliev, V., Vyahhi, N. & Tesler, G. QUAST: quality assessment tool for genome assemblies. *Bioinformatics* **29**, 1072–1075 (2013).
79. Ter-Hovhannisyan, V., Lomsadze, A., Chernoff, Y. O. & Borodovsky, M. Gene prediction in novel fungal genomes using an ab initio algorithm with unsupervised training. *Genome Res.* **18**, 1979–1990 (2008).
- 536 80. Dobin, A. *et al.* STAR: ultrafast universal RNA-seq aligner. *Bioinformatics* **29**, 15–21 (2013).
81. Hoff, K. J., Lange, S., Lomsadze, A., Borodovsky, M. & Stanke, M. BRAKER1: unsupervised RNA-Seq-based genome annotation with GeneMark-ET and AUGUSTUS. *Bioinformatics* **32**, 767–769 (2016).
- 540 82. Laumer, C. E., Hejnl, A. & Giribet, G. Nuclear genomic signals of the ‘microturbellarian’ roots of platyhelminth evolutionary innovation. *eLife* **4**, e05503 (2015).
- 544 83. Haas, B. J. *et al.* De novo transcript sequence reconstruction from RNA-seq using the Trinity platform for reference generation and analysis. *Nat. Protoc.* **8**, 1494–1512 (2013).
84. Emms, D. M. & Kelly, S. OrthoFinder: solving fundamental biases in whole genome comparisons dramatically improves orthogroup inference accuracy. *Genome Biol.* **16**, 157 (2015).

- 548 85. Yang, Y. & Smith, S. A. Orthology inference in nonmodel organisms using transcriptomes and  
low-coverage genomes: improving accuracy and matrix occupancy for phylogenomics. *Mol. Biol.  
Evol.* **31**, 3081–3092 (2014).
86. Ballesteros, J. A. & Hormiga, G. A new orthology assessment method for phylogenomic data:  
552 Unrooted Phylogenetic Orthology. *Mol. Biol. Evol.* **33**, 2117–2134 (2016).
87. Wu, M., Chatterji, S. & Eisen, J. A. Accounting for alignment uncertainty in phylogenomics. *PLOS  
ONE* **7**, e30288 (2012).
88. Price, M. N., Dehal, P. S. & Arkin, A. P. FastTree 2 – approximately Maximum-Likelihood trees for  
556 large alignments. *PLOS ONE* **5**, e9490 (2010).

560

564

568

**Figure 1** – Consensus phylogram showing deep metazoan interrelationships under Bayesian phylogenetic inference of the 430-orthologue amino acid matrix, using the CAT+GTR+Γ4 mixture model. All nodes received full posterior probability. Numerical annotations of given nodes represent Extended Quadripartition Internode Certainty (EQP-IC) scores, describing among-gene-tree agreement for both the monophyly of the 5 major metazoan clades and the given relationships between them in this reference tree. A bar chart on the right depicts the proportion of the total orthologue set each terminal taxon is represented by in the concatenated matrix. ‘Placozoa H1’ in this and all other figures refers to the GRELL isolate sequenced in Srivastava et al 2008, which has there and elsewhere been referred to as *Trichoplax adhaerens*, despite the absence of type material linking this name to any modern isolate. Line drawings of clade representatives are taken from the BIODIDAC database (<http://biodidac.bio.uottawa.ca/>).

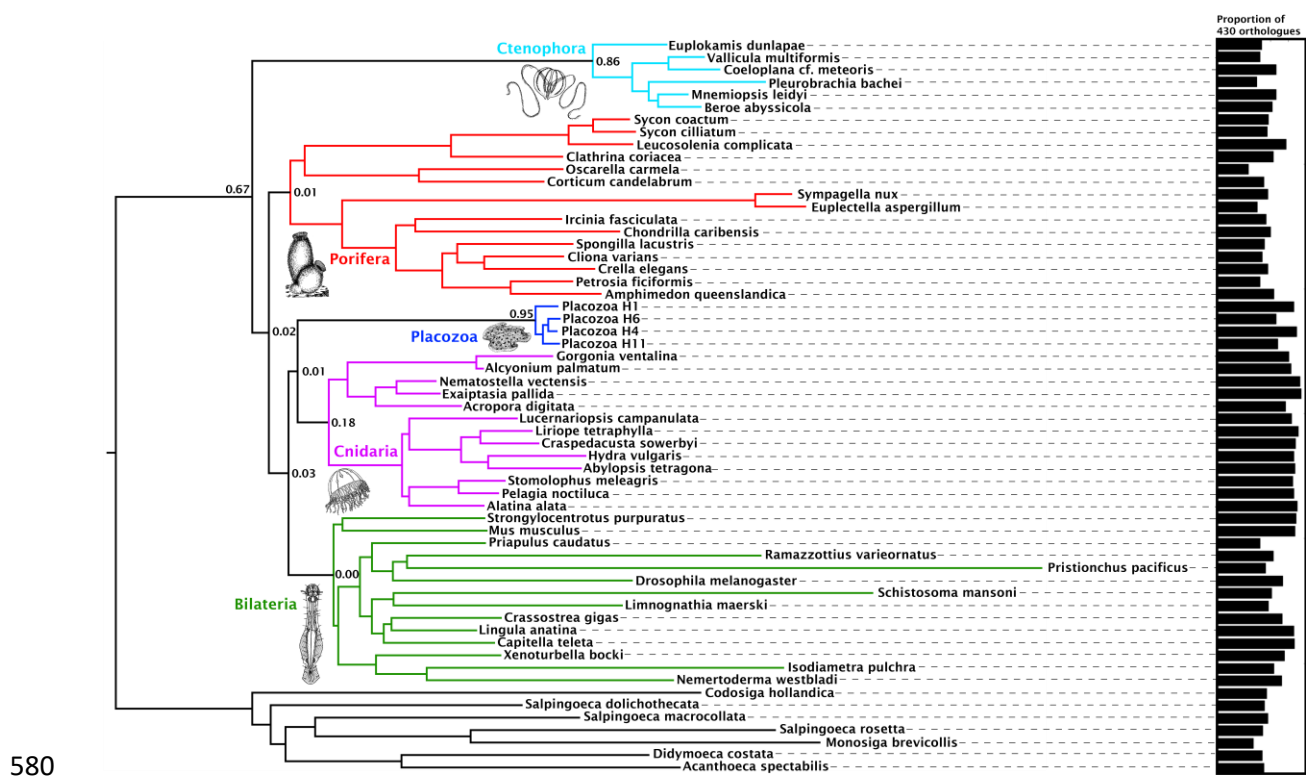



**Figure 2** – Consensus phylogram under Bayesian phylogenetic inference under the CAT+GTR+Γ4

584 mixture model, on the 430-orthologue concatenated amino acid matrix, recoded into 6 Dayhoff  
groups. Nodes annotated with posterior probability; unannotated nodes received full support.

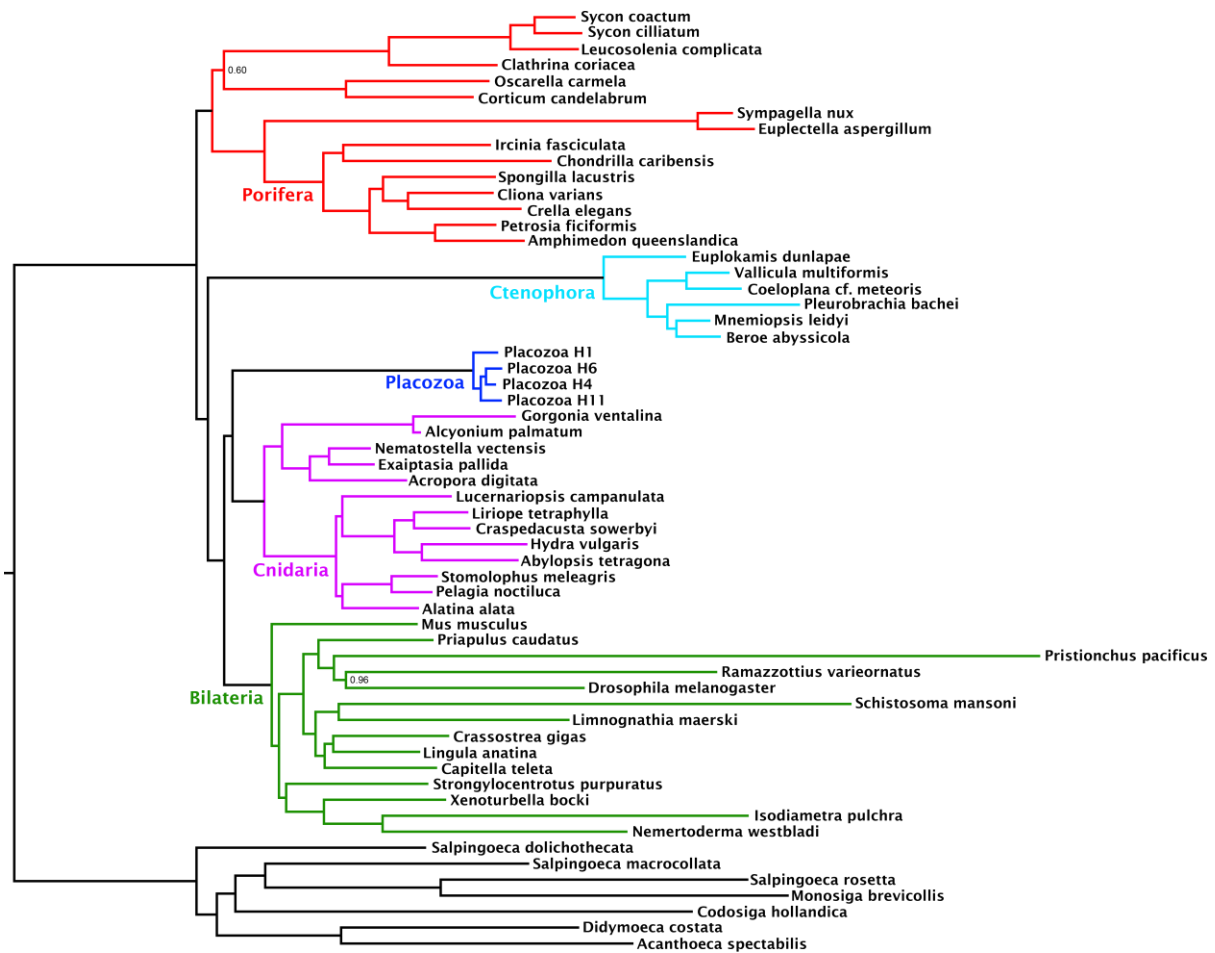

588

592

**Figure 3** – Proposed homology of germ layers across “eumetazoan” taxa, including Placozoa, extending the proposal of <sup>63</sup>), and interpreting the lower epithelium of Placozoa as homologous to cnidarian pharyngeal ectoderm. Colour scheme: red corresponds to bilaterian mesoderm, 596 cnidarian/ctenophoran “endoderm”, and placozoa fibre cells; blue corresponds to non-digestive ectoderm and placozoa upper epithelium; yellow corresponds to bilaterian endoderm, cnidarian/ctenophore pharyngeal ectoderm, and the digestive placozoa lower epithelium. Figure modified from Steinmetz et al., 2017.

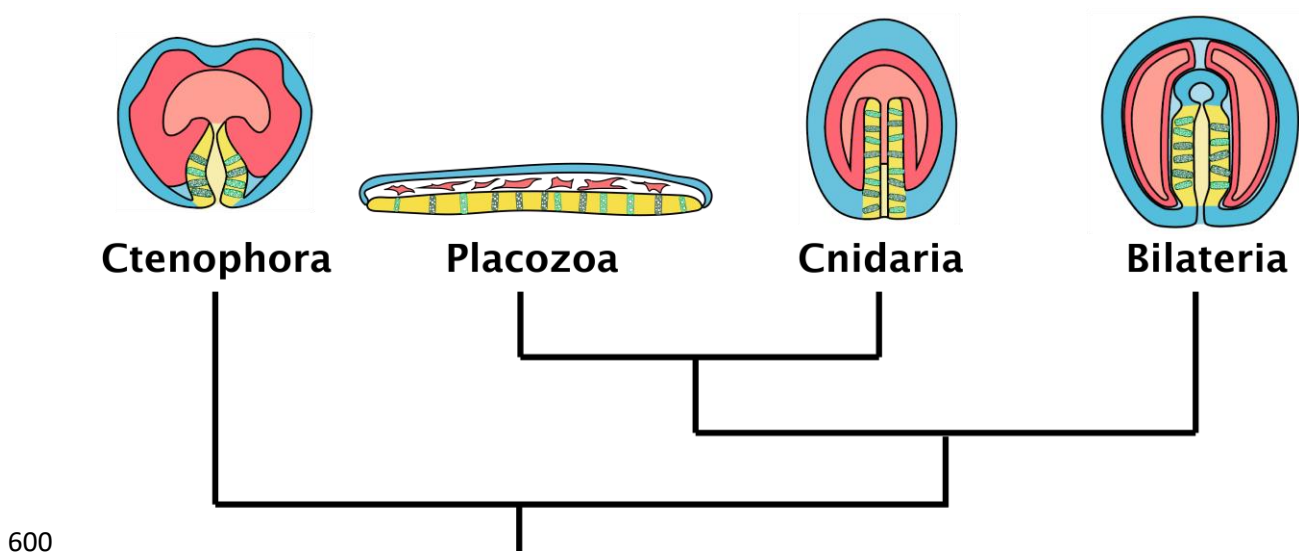

604

608

**Table S1:** Results from posterior predictive simulation test of amino acid compositional homogeneity based on converged CAT+GTR+Γ4 MCMC. Means of the predicted and the observed summed absolute differences in global and taxon-specific amino acid frequencies, and corresponding z-scores and p-values are shown on a per-taxon basis. The maximum and mean-squared z-scores globally among all taxa are 107.245 and 178.053 (both corresponding to  $p \sim 0$ ).

| taxon abbreviation | observed mean | mean predicted | z-score | pp        |
|--------------------|---------------|----------------|---------|-----------|
| ACOE_Isop          | 0.000126822   | 1.87E-05       | 15.2787 | 0         |
| ANNE_Ctel          | 1.91E-05      | 1.07E-05       | 2.21058 | 0.0317146 |
| ARTH_Dmel          | 9.31E-05      | 1.53E-05       | 14.3127 | 0         |
| BRAC_Lana          | 0.000145076   | 1.09E-05       | 35.827  | 0         |
| CNID_Aala          | 5.58E-05      | 8.78E-06       | 15.0358 | 0         |
| CNID_Adig          | 0.000100636   | 2.09E-05       | 12.0763 | 0         |
| CNID_Aplm          | 0.000134735   | 1.25E-05       | 28.3293 | 0         |
| CNID_Atet          | 0.000133082   | 1.21E-05       | 29.2823 | 0         |
| CNID_Csow          | 5.00E-05      | 1.00E-05       | 11.0198 | 0         |
| CNID_Epal          | 0.000110763   | 8.97E-06       | 31.4289 | 0         |
| CNID_Gven          | 5.66E-05      | 1.52E-05       | 7.80069 | 0         |
| CNID_Hvul          | 0.000486571   | 1.26E-05       | 106.93  | 0         |
| CNID_Lcmp          | 5.18E-05      | 1.11E-05       | 10.7092 | 0         |
| CNID_Ltet          | 9.13E-05      | 9.81E-06       | 23.6686 | 0         |
| CNID_Nvec          | 5.24E-05      | 8.63E-06       | 14.0743 | 0         |
| CNID_Pnct          | 0.000129513   | 9.73E-06       | 32.8867 | 0         |
| CNID_Smel          | 0.000113264   | 1.12E-05       | 25.6164 | 0         |
| CRAN_Mmus          | 0.000166861   | 9.76E-06       | 45.6254 | 0         |
| CTEN_Baby          | 0.000181374   | 2.09E-05       | 21.3111 | 0         |
| CTEN_Cmet          | 0.000343129   | 2.55E-05       | 37.4373 | 0         |
| CTEN_Edun          | 0.000128115   | 3.45E-05       | 8.41983 | 0         |
| CTEN_Mlei          | 0.000183004   | 1.73E-05       | 26.4981 | 0         |
| CTEN_Pbac          | 6.55E-05      | 3.74E-05       | 2.0903  | 0.03667   |
| CTEN_Vmul          | 0.000223009   | 3.31E-05       | 16.3116 | 0         |
| ECHI_Spur          | 6.09E-05      | 1.25E-05       | 11.3447 | 0         |
| MICR_Limn          | 8.94E-05      | 2.55E-05       | 7.99777 | 0         |
| MOLL_Cgig          | 0.000120946   | 1.55E-05       | 20.9106 | 0         |
| NEMA_Ppac          | 0.00017687    | 2.82E-05       | 15.1375 | 0         |
| NEMO_Nemw          | 0.000269249   | 1.40E-05       | 50.8347 | 0         |
| OUTC_Aspc          | 0.000670815   | 2.83E-05       | 67.9677 | 0         |
| OUTC_Chol          | 0.000902683   | 2.88E-05       | 90.125  | 0         |
| OUTC_Dcos          | 0.000116833   | 2.97E-05       | 8.24523 | 0         |
| OUTC_Mbre          | 0.00131207    | 3.63E-05       | 105.784 | 0         |
| OUTC_Sdol          | 0.000208827   | 2.80E-05       | 18.4014 | 0         |
| OUTC_Smac          | 0.000823553   | 3.16E-05       | 76.1541 | 0         |

|           |             |          |         |   |
|-----------|-------------|----------|---------|---|
| OUTC_Sros | 0.000729399 | 3.51E-05 | 59.066  | 0 |
| PLAC_Tadh | 0.00035538  | 1.09E-05 | 86.7863 | 0 |
| PLAC_TH11 | 0.000371389 | 1.53E-05 | 66.2643 | 0 |
| PLAC_TpH4 | 0.000384356 | 1.02E-05 | 99.7631 | 0 |
| PLAC_TpH6 | 0.000336081 | 2.69E-05 | 40.1855 | 0 |
| PLAT_Sman | 0.00041205  | 2.04E-05 | 54.7133 | 0 |
| PORI_Aque | 0.000113131 | 1.65E-05 | 16.5138 | 0 |
| PORI_Ccan | 0.00028527  | 3.61E-05 | 21.1886 | 0 |
| PORI_Ccor | 0.00036407  | 1.99E-05 | 47.6031 | 0 |
| PORI_Cele | 0.000142936 | 2.41E-05 | 13.7564 | 0 |
| PORI_Cnuc | 0.000153193 | 2.26E-05 | 17.4678 | 0 |
| PORI_Cvar | 7.37E-05    | 2.29E-05 | 6.02898 | 0 |
| PORI_Easp | 0.000460482 | 3.21E-05 | 38.133  | 0 |
| PORI_lfas | 0.000189636 | 5.30E-05 | 9.27256 | 0 |
| PORI_Lcom | 0.000381785 | 1.59E-05 | 69.4664 | 0 |
| PORI_Ocar | 0.000183895 | 4.53E-05 | 9.47869 | 0 |
| PORI_Pfic | 0.000179352 | 2.68E-05 | 16.7344 | 0 |
| PORI_Scil | 0.000264263 | 2.43E-05 | 27.499  | 0 |
| PORI_Scoa | 0.00043878  | 2.45E-05 | 49.549  | 0 |
| PORI_Slac | 0.000150108 | 2.09E-05 | 17.1727 | 0 |
| PORI_Snux | 0.000405488 | 2.49E-05 | 44.4707 | 0 |
| PRIA_Pcau | 0.000100341 | 3.12E-05 | 6.06594 | 0 |
| TARD_Rvar | 9.58E-05    | 2.14E-05 | 10.334  | 0 |
| XENO_XbJC | 5.18E-05    | 1.60E-05 | 6.99361 | 0 |

616

620

624 **Figure S1:** Maximum likelihood analyses of 430-orthologue matrix, inferred under the posterior  
mean site frequency mixture model approximation in IQ-tree 1.6beta, with LG substitution matrices,  
a FreeRates distribution of rate heterogeneity, and ML optimised residue frequencies. Numerals  
annotating certain nodes represent UFboot supports, a.) with additional NNI searches to correct for  
628 model misspecification; b.) without such secondary optimization, and c.) with NNI correction on a  
matrix from which all 3 clade A placozoan representatives were deleted. Nodes without annotation  
received full support in all analyses.

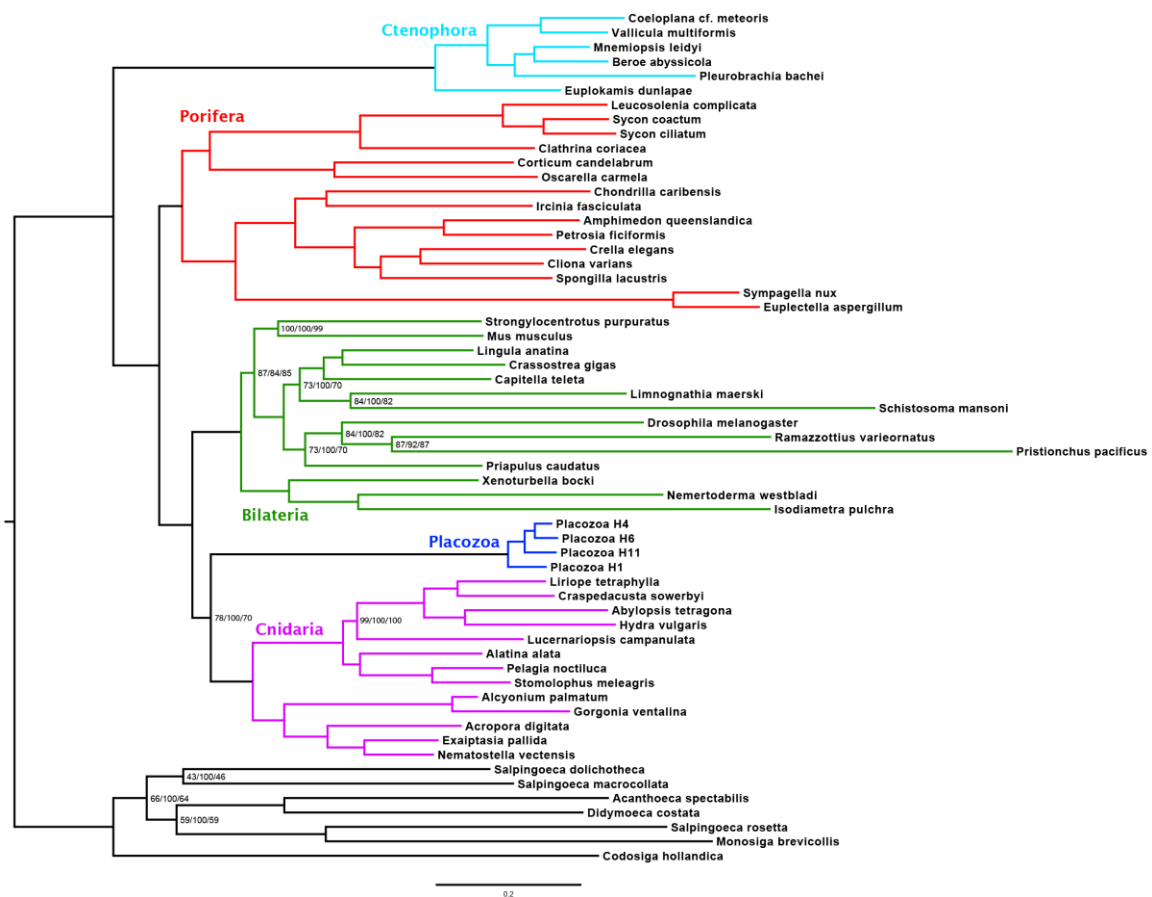

Source: http://biorxiv.org/content/10.1101/200972v1.full.pdf
